# Supplementary material for: Pythium species from rice roots differ in virulence, host colonization and nutritional profile
Source: PubMed Central journal article supplement (PMC3878986; doi:10.1186/1471-2229-13-203), 2013-12-05

*P. arrhenomanes*

*P. graminicola*

*P. inflatum*

+

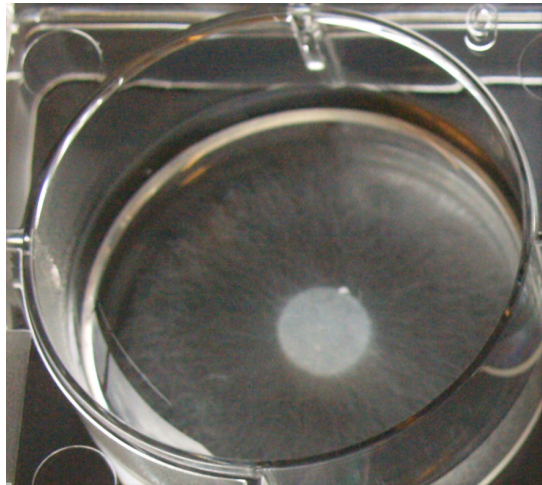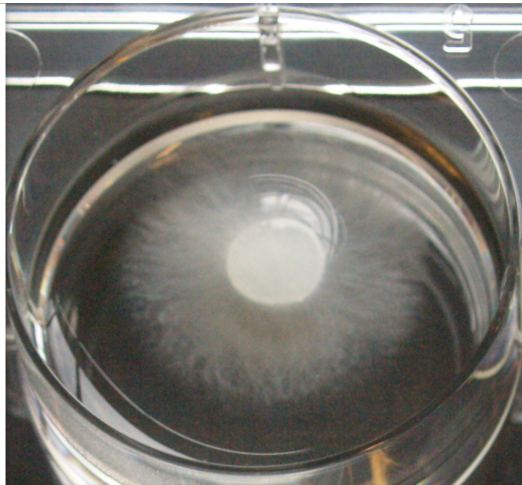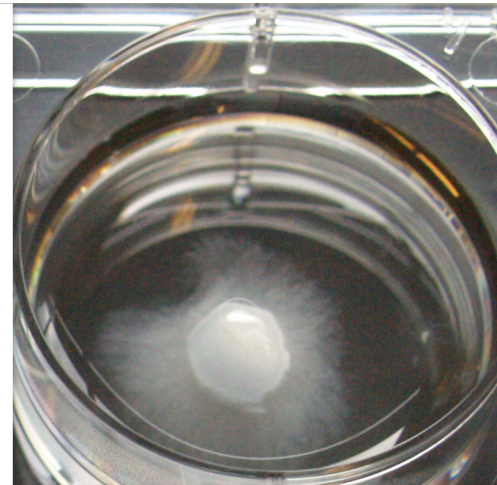

-

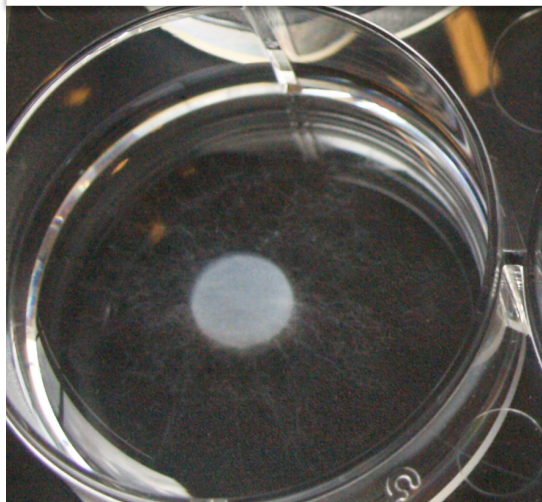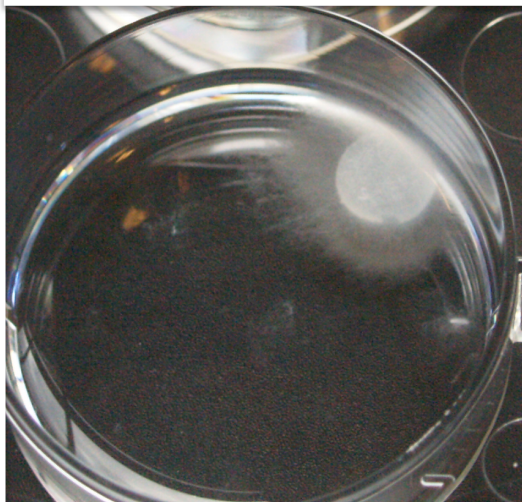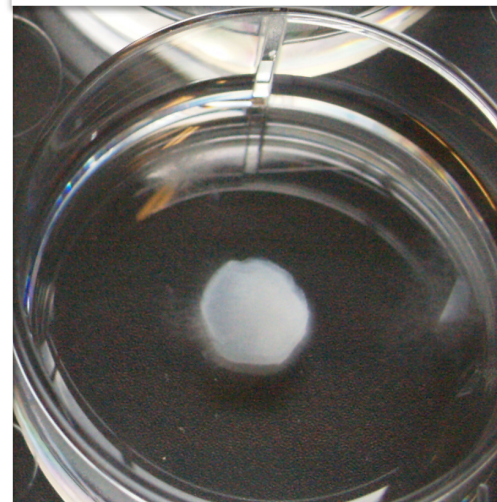

Supplement: 1471-2229-13-203-S1.pdf [file 1471-2229-13-203-S1.pdf]
